# Supplementary material for: The α-arrestin SUP-13/ARRD-15 promotes isoform turnover of actin-interacting protein 1 in Caenorhabditis elegans striated muscle
Source: PubMed Central journal article supplement (PMC10590129; doi:10.1093/pnasnexus/pgad330), 2023-10-11
Supplement: pgad330_supplementary_data.pdf [file pgad330_supplementary_data.pdf]

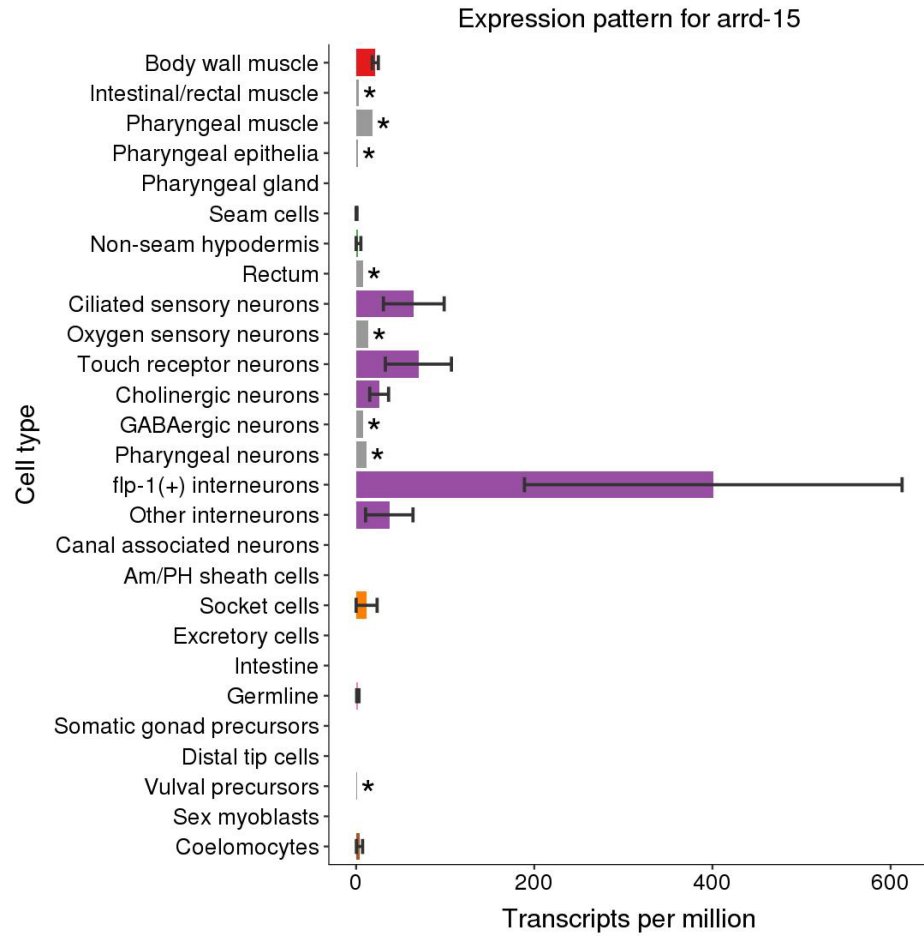

**Figure S1. mRNA expression pattern of *sup-13/arrd-15*.** Data are derived from GExplore 1.4 (<http://genome.sfu.ca/gexplore/>).

**Table S1.** *C. elegans* strains used in this study

| <b>Strain</b> | <b>Genotype</b>                                                              | <b>Reference</b>              |
|---------------|------------------------------------------------------------------------------|-------------------------------|
| N2            | Wild-type                                                                    | Brenner (1974) <sup>1</sup>   |
| RW2337        | <i>sup-13(st210) III;unc-78(e1217) X</i>                                     | Waterston (1988) <sup>2</sup> |
| CB1217        | <i>unc-78(e1217) X</i>                                                       | Brenner (1974) <sup>1</sup>   |
| ON5           | <i>unc-78(gk27) X</i>                                                        | Ono (2001) <sup>3</sup>       |
| ON320         | <i>sup-13(st210) III;unc-78(gk27) X</i>                                      | This study                    |
| ON341         | <i>sup-13(st210) III</i>                                                     | This study                    |
| ON355         | <i>aipl-1(kt4[aipl-1::3XFLAG::gfp]) V</i>                                    | This study                    |
| ON362         | <i>aipl-1(kt4[aipl-1::3XFLAG::gfp]) V;unc-78(gk27) X</i>                     | This study                    |
| ON357         | <i>sup-13(st210) III; aipl-1(kt4[aipl-1::3XFLAG::gfp]) V;unc-78(gk27) X</i>  | This study                    |
| ON381         | <i>sup-13(st210) III; aipl-1(kt4[aipl-1::3XFLAG::gfp]) V</i>                 | This study                    |
| PHX4137       | <i>arrd-15(syb4137[arrd-15::gfp]) III</i>                                    | This study                    |
| ON369         | <i>sup-13(st210) III;unc-78(gk27) X;ktEx252[myo-3p::gfp::ARRD-15a, pRF4]</i> | This study                    |

<sup>1</sup>S. Brenner, The genetics of *Caenorhabditis elegans*. *Genetics* **77**, 71-94 (1974).

<sup>2</sup>R. H. Waterston, "Muscle" in *The Nematode C. elegans*, W. B. Wood, Ed. (Cold Spring Harbor Laboratory, 1988), pp. 281-335.

<sup>3</sup>S. Ono, The *Caenorhabditis elegans unc-78* gene encodes a homologue of actin-interacting protein 1 required for organized assembly of muscle actin filaments. *J Cell Biol* **152**, 1313-1319. (2001).
